# Supplementary material
Source: publisher figshare collection journal article supplement (https://acs.figshare.com/ndownloader/files/5607821)
Supplement: Supplementary file 1 [file 5607821]

## Sheet: Hapalochlaena maculosa
Table S10. All protein sequences from Hapalochlaena maculosa with homology to a transcript isolated in a previous study. Putative toxin IDs are highlighted in yellow.
Name	Sequence Length	Sequence	Hit start	Hit end	Query	Max Query Length	Query start	Query end	Query coverage	E Value	Grade
comp74855_c0_seq1_m_388658	423	LRGSSHLNLKRSQDMKVLVAFLFCLSVAVSFNYTDFYLIKVKPIKSDGLDFLKKLEAQYPFDYDFWIPPSKLKRNAELFLPKSTYDTIKDHMKTIGIKTTVLSKNIQREIEKEKDVDRSVATLNTTKYVFIHAIDRKLKSLAEMYNHISLIPYGKSHESRQLYALKFSSGPGRRSIIVEAGMHGRDWIAIAATMKLMEYMATEYKDNIDVRIMVNNFDWVFVPVANPDGYVATYSQNRLWKKNMKRDMGTKCVGVDLNRNFNANWGKEGSIGDPCNRAYRGKSAFSEPETVALSKLVRNTRNKLAYFSIHAYSQYILTPFACKTEKPENSAHLIEVAEKVMKAIYDETGSRYLVGTPPDVSYPFKGSSFDWAKMEMNIKYSYTLRLGPPALNGKGFIVP…	324	423	gi|476534645|gb|JAA74574.1|	100	2	101	0.9901	1.47e-68	0.995	Ruder et al 2013
comp48754_c1_seq1_m_60072	462	MPKEKTHINIVVIGHVDSGKSTTTGHLIYKCGGIDKRAIEKFEKEAQEMGKGSFKYAWVLDKLKAERERGITIDIALWKFETEKYCITIIDAPGHRDFIKNMITGTSQADCAVLVVAAGKGEFETGISKNGQTREHALLAYTLGVKQLIVAVNKMDTHDYCKVRFEEIVKEVSSYIKKIGYNPKAVAFVPVSGWHGDNMLEPSANMPWYTGWSIERKEGNASGKTLFNALDSIVPPQRPTERPLRLPLQDVYKIGGIGTVPVGRVETGVLKPGVVVTFAPANVSTEVKSVEMHHESLPEAMPGDNVGFNVKNVSVKDLRRGFVAGDSKNDPPKETKHFEAQVIVINHPGQIAAGYSPVLDCHTAHIACKFTELKEKIDRRSGKKLEDAPKAIKSGDAAI…	207	348	gi|56118019|gb|AAV73885.1|	142	1	142	1	3.1e-100	1	Guzik et al. 2005
comp29671_c0_seq1_m_30130	302	YVCMYVCNYVCMQECMCVRVGEEVYWFLINMRSKLCSCISEVLITMFKSLGLVLLAVLACYHALPLNEVNEHIVDGIPSQHCEFPHMVFISISLVTGESYCGATLISNKHVLTAAHCIEKGVKSITAHFGSTNKDNSTVQIPVRQWVKHREYIKKHTIDNDIAVLELVSPVPTGRCIAPIEVPKKGDTFHKRCVTAGWGKTAENGIYPTQMRRTNIDIIRNDKCQTYSPGTTVEQHICVGDLLKNGKNICNGDSGGGLICRRTYDNKYVVAGVASYGFDCDEGFGVFTNTGTFRDFIDDYTT	46	302	gi|212168851|gb|ACJ22641.1|	257	1	257	1	0	1	Fry et al 2009
comp29651_c0_seq1_m_30075	254	MLAIFCLAIVLSLSFAAPEEHIVGGSPAANCQYPSIVHLLFNTNKGVFECGGTLLDSQHVLTAAHCFAPGTSSISVNIGTNNNEKRGQHVMTATQWKVHSQYSPSPMRNDIAMIRLPKPVSFGECVAAAPLPGLREKFDKKKCVAAGWGRTGFDESSSVVLRHVAMPVVDHAVCKERMDYASLTDQHICGGDFNYGGASTCMGDSGGPFYCPSKSGKMVVAGITSFGYDCAIDAAIFTSVSYFRNWIDDALRSL	19	254	gi|476534636|gb|JAA74570.1|	236	1	236	1	2.41e-180	1	Ruder et al 2013
comp29613_c0_seq1_m_29982	263	MFSSVCFLVTLALAYTNAAETKNATSKEQIVAGKPARACQFPSIVHLLFDTADFSAGCGGTLVSDRHVLTASHCFPEGLQKIRVRIGDVNVDQGGVLTIFANSWSMHPNYNSDPMRNDIAVIHLESPVTFTNCIKASPIPAANKVYDNKKCIAAGWGAVGETQPGPATLHHVAMSVINHETCKSKIPFANLQKDHLCAGDFVKGGASTCVGDSGGPLYCPDNGKMVVAGVTSYGYGCEVDIPPIFTNVAYYNKWIKEMMKMLD	8	256	gi|476534634|gb|JAA74569.1|	249	1	249	1	0	1	Ruder et al 2013
comp47756_c0_seq1_m_57632	405	MAQPDVLVKLLICGGGNGAHVLTGLASSRRNVQVNVMSLFADEAERFRNTLGNDLFTVEFKEKDGTTNIIKSRPNMITNDPAKAVPGCNIIIFTVPAFAHEGYFKAIAPYIEPNTVVVGLPSQPGFQFQCCDLLGIGGKTCAIVSFESLPWACRIQKFAQEVQVLGPKDTLACAIIKRGCRPHFPILPTIQYIIGKEPKLTLAANYLSINLLADSVVHPPMMYGTWKDWDGKPVSEKPLFYQGLNDFAAGMLDKVSTELFNTAQAIQKKYPDMDMSDVIHLFDWYKLNYKESISDFSTLQTAMRTCKAYNGLVHPMKEVEGGKFVPDFNYRYMTEDLPFGMVVFRGIAQLAGVPTPAMDETILWGQKILGKEFLVDGELKGKDMGMTRAPQRYHFTSLF…	47	306	gi|45510960|gb|AAS67052.1|	260	1	260	1	0	0.998	Strugnell et al. 2004
comp17608_c0_seq1_m_14275	432	MFSLNLVWILCVIFLSPGTSLPEKLFDRAFAVIWNAPSGVCENHLGITFNFDHYNIIQNTGDHFQGDKMVIFYERQLGMYPFILPNGTHINGGIPQLLNLTQHLKQAKLDVAKAIPSQDFEGPAVIDWESWRPLYERNFGDKRVYKRVAVADVQKQHPDWNVAEVHSDAKIQFDEAARNLMSSTLNLGEEMRSGGRWGFYGFPRIYQKFPEQTRIDNDRLGWLFSLSSALYPSIYLHSKNDTWLKHFQFVVNTLNETFRIYDKFSLKNKTFVVPYVRFRYDPEALFTKAELLLSMTIPAATGSAGVIIWDSSFSYRNREHCKIVKNYVTTTLGPFVKNLTETFQYCSEHLCNGNGRCVKSWQNIGDSSYWYNSKGEFNAFEDLKFERRELKALLDIVKN…	1	269	gi|476534638|gb|JAA74571.1|	269	5	273	0.9642	0	0.978	Ruder et al 2013
comp74863_c0_seq1_m_388675	414	MKVVILFLFCLSLVAASRHKTAKNYRGHPLLKMVPLTESGLENLKHKAVSSLDLDFWIPPTKVNVSAECLMTPGFYSVFKNYSKHPDIQVTVLTEDIGYAIQQESYDSTLYSEKPVTSTYATFDKIVRLIKKYADNYSHVSLKKYGTSYENRDLYAIKFSVGPGKQTIIVEAGMHSREWIAIASTLKIIENFATKRDIDNEVTELLESYDWLFIPVSNPDGYHTTHTMDRMWRKNMNPTTDYCIGTDLNRNFDAMWGGEGASPNPCHPTYRGARAFSEPESHDLSRFVRSTRDKIAFISVHAYSQLILTPYGCTRKKPQDSDHLTYVANQAKQAIYRETGRDFIVGTPPDILYPATGGAYDWAKMKMKVKYAYAFELRPDPHSRRGFILPSAEIEPSSR…	110	233	gi|476534647|gb|JAA74575.1|	124	1	124	1	4.31e-86	0.996	Fry et al 2009
comp29992_c0_seq2_frame_5_orf_8	124	KAREPPDLHHSNQTQEDYNMLTYLSIFCFFIAVISTGDCHSFRNCSYHGKLYDFGEHFMDNCKSCECTEGGIVLCMGIADCSESYVCHHNGTAYKAGEKFPAPTGECTCTYDRGIICSVNKKVH	20	124	gi|212169150|gb|ACJ22659.1|	105	1	105	1	6.52e-74	0.995	Fry et al 2009
comp74924_c0_seq1_m_388877	273	IYIYIYTQPAALNHCWHRKRFTPISFILNTHRLRLNMSLQLCVLLLAMVPLISADLIDSEHLRDFVLQFHNDHRANEGASDMIKLVWSKQLATEAYKWAQQCNFEHQMKGRGENLAFDSNAGTIKDLLRSEMQGWFDEKADFNRNDQSCGMNCHYTQMVWANTTHVGCAAINCPNLLAFGHYVKNAKYLVCFYYPRGNFGNNIYTVGASCSKCPANHNRCSNGLCYGGHSGDVAAMDPCPDLNTNCKMWAKMGECHNNPEYMTTNCRKSCNTC	37	193	gi|212168769|gb|ACJ22636.1|	157	1	157	1	1.75e-114	0.99	Fry et al 2009
comp66428_c0_seq1_m_136759	141	MVAILVSVEITIWSSAHLSSVLKKMWTKKEVCLYNKKEYNVGATFKDDCNTCSCKSNNVVVCTKMLCSVNYKSEADVCVYKDKVYKIGASFKDRCNNCRCSSKNRVMCTKRLCPATKEDITKLRQYLTNEKIVKLPANKKD	22	141	gi|476534640|gb|JAA74572.1|	120	48	167	0.7186	2.06e-75	0.83	Ruder et al 2013
comp74855_c0_seq1_m_388658	423	LRGSSHLNLKRSQDMKVLVAFLFCLSVAVSFNYTDFYLIKVKPIKSDGLDFLKKLEAQYPFDYDFWIPPSKLKRNAELFLPKSTYDTIKDHMKTIGIKTTVLSKNIQREIEKEKDVDRSVATLNTTKYVFIHAIDRKLKSLAEMYNHISLIPYGKSHESRQLYALKFSSGPGRRSIIVEAGMHGRDWIAIAATMKLMEYMATEYKDNIDVRIMVNNFDWVFVPVANPDGYVATYSQNRLWKKNMKRDMGTKCVGVDLNRNFNANWGKEGSIGDPCNRAYRGKSAFSEPETVALSKLVRNTRNKLAYFSIHAYSQYILTPFACKTEKPENSAHLIEVAEKVMKAIYDETGSRYLVGTPPDVSYPFKGSSFDWAKMEMNIKYSYTLRLGPPALNGKGFIVP…	179	307	gi|476534643|gb|JAA74573.1|	129	1	129	1	2.72e-86	0.965	Ruder et al 2013
comp74089_c0_seq1_m_353067	259	MNFLQRLLVSLLLCLLFETKNAASTDVTGNQTDLDAKRCQFPHMALLKIFTGNKSHICGGALVGDIFVITAAHCFPKGWTFVDVSLGGTNSSVAAATFHINRTNVHIHRAFKKLNSSFLLYENDTAFVVLPRPIKASKCIRPITTATLNDTYYSSCFMVGWEINSSKVNNDAVLKWQHVILLPAKACGIIAGQLAKRRICASHLRLHGGEETCQGGEGGSLVCFTKDNRAVLAGFTSSEAVCQHGISVCNRVAYFFIED	1	182	gi|212169021|gb|ACJ22651.1|	182	1	182	1	5.14e-115	0.964	Fry et al 2009
comp74798_c0_seq1_frame_3_orf_5	101	FGDQQTLHSKMVSLTIKLMLVSLVLCVGVEAMLSSSSCLTKCLAVQCRNSMRHTCQKLCTCGCRTPWEVKLNKENCPVPEHGGFEHDPTFGSQHQLTNYPH	11	101	gi|212169100|gb|ACJ22656.1|	92	1	92	1	2.29e-37	0.815	Fry et al 2009
